# Supplementary material
Source: HighWire-hosted journal article supplement (http://dmd.aspetjournals.org/highwire/filestream/73793/field_highwire_adjunct_files/0/86249SupplFigure.pdf)

Development of a gold nanoparticle-functionalized surface plasmon resonance assay for the sensitive detection of monoclonal antibodies and its application in pharmacokinetics

Haihong Bai, Mei Yuan, Xiaojing Wang, Xinghe Wang, Jinjing Che

Drug Metabolism and Disposition

Supplemental Figure 1 Serum concentration-time profiles of Erbitux and C225 in rhesus monkeys during and after intravenous infusion administration at 7.5 mg/kg by SPR assay. The symbols represent the observed data (mean  $\pm$  SD, n=3).

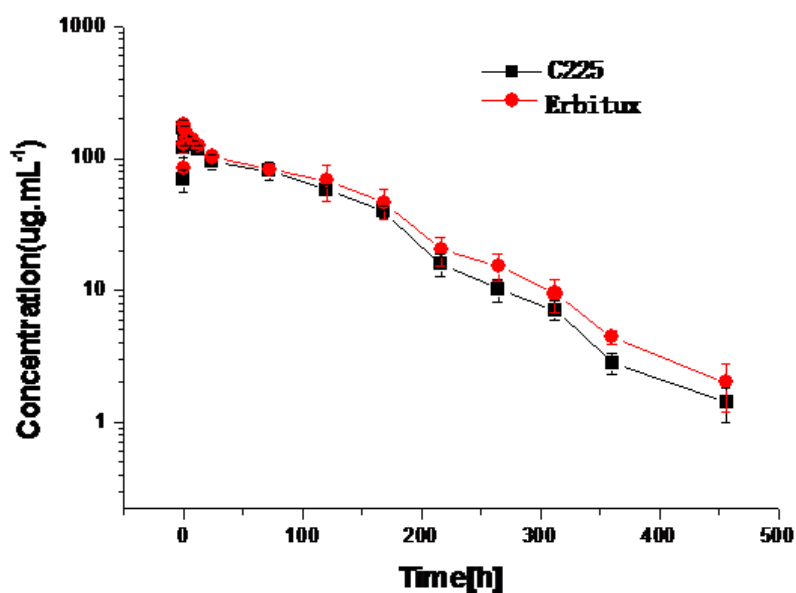

Supplement: 86249SupplFigure.pdf [file 86249SupplFigure.pdf]
